# Supplementary material for: A microRNA profile of human CD8+ regulatory T cells and characterization of the effects of microRNAs on Treg cell-associated genes
Source: Springer Nature journal article supplement (doi:10.1186/s12967-014-0218-x), 2014-08-05
Supplement: MOESM13 [file 9766292]

| Gene                    | IL2RA    | FOXP3    | CTLA-4    | CCR4       | GARP       | IL10      | TGF-B     |
|-------------------------|----------|----------|-----------|------------|------------|-----------|-----------|
| CD8+CD25+/<br>CD8+CD25- | 65±1,414 | 11,5±4,9 | 3.19±1,73 | 13.43±4,69 | 13,66±4,12 | 4.86±2,68 | 4.57±2,61 |

| Gene                    | CD28       | ICOS        | FOXO1      | HELIOS     |
|-------------------------|------------|-------------|------------|------------|
| CD8+CD25+/<br>CD8+CD25- | 0,05±0,019 | 0,342±0,125 | 0,18±0,078 | 0,288±0,13 |
