# Supplementary figures and images for: A microRNA profile of human CD8+ regulatory T cells and characterization of the effects of microRNAs on Treg cell-associated genes
Source: Springer Nature journal article supplement (doi:10.1186/s12967-014-0218-x), 2014-08-05

relative expression of CTLA-4

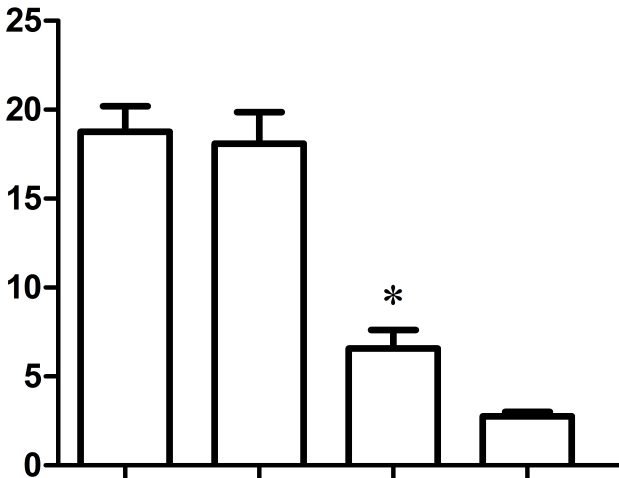

Treg

Treg + lentimiR-ctrl

Treg + lentimiR-155

non Treg

Supplement: MOESM10 [file 9766292]

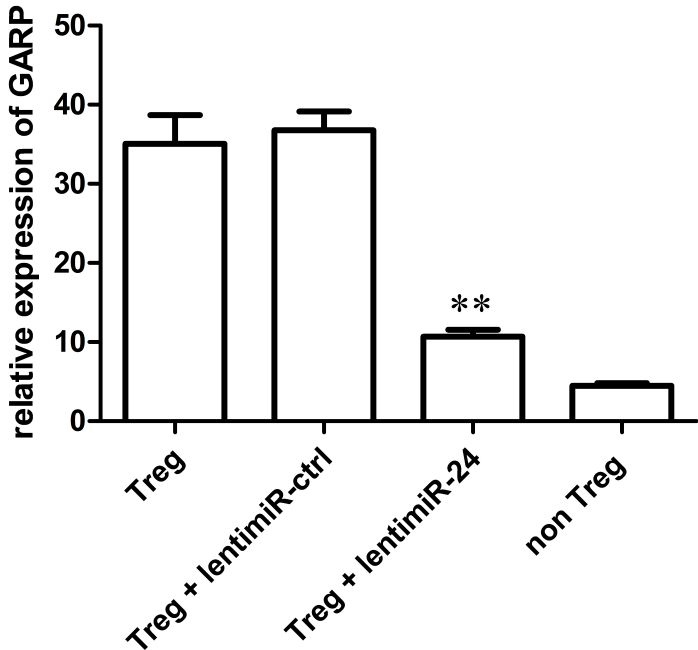

Supplement: MOESM11 [file 9766292]

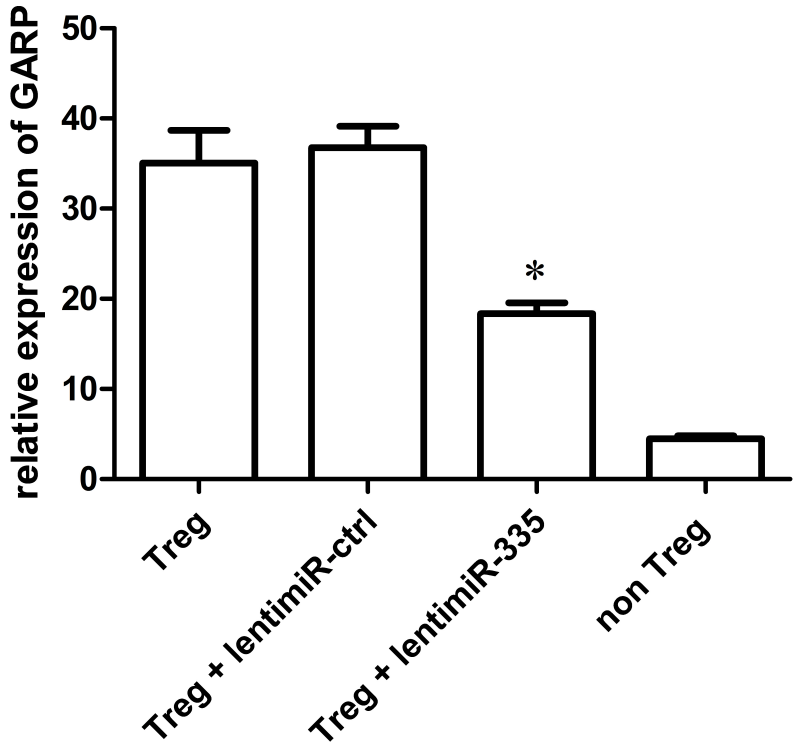

Supplement: MOESM12 [file 9766292]

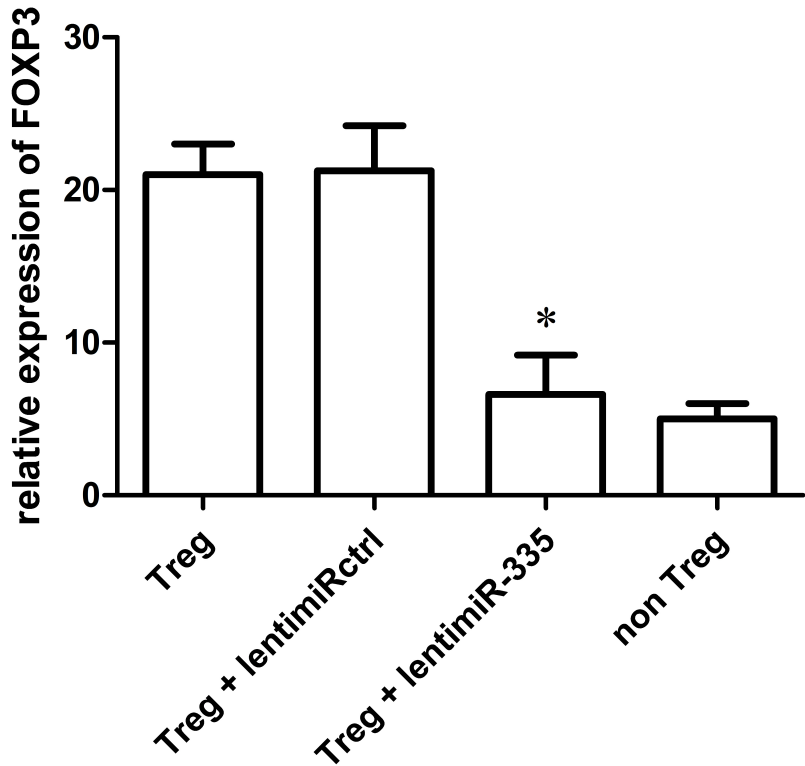

Supplement: MOESM8 [file 9766292]

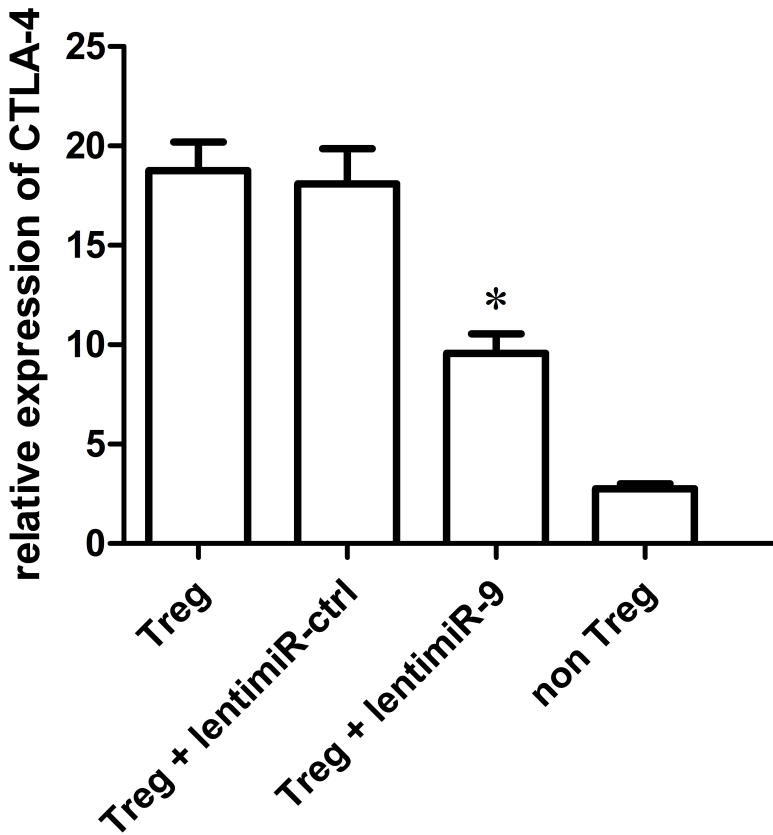

Supplement: MOESM9 [file 9766292]
